# Supplementary material for: A tetranuclear organorhenium(i) complex of the 2,3,5,6-tetrafluoro-7,7,8,8-tetracyano-p-quinodimethane radical anion, TCNQF4˙−
Source: Royal Society of Chemistry journal article supplement (doi:10.1039/b807977c), 2008-01-01

**A tetranuclear organorhenium(I) complex of the 2,3,5,6-tetrafluoro-7,7,8,8-tetracyano-*p*-quinodimethane radical anion, TCNQF4<sup>•-</sup>**

**Amarendra N. Maity, Biprajit Sarkar, Mark Niemeyer, Monika Sieger, Carole Duboc, Stanislav Zális̄ and Wolfgang Kaim\***

**Electronic Supporting Information**

**Table S.** Selected experimental and ADF/BP calculated bond lengths (Å) and angles (°) for  $\{(\mu_4\text{-TCNQF4})[\text{Re}(\text{CO})_3(\text{bpy})]_4\}(\text{PF}_6)_3$ .

| <i>bond lengths</i> | Exper.    | Calc. | <i>bond lengths</i> | Exper.    | Calc. |
|---------------------|-----------|-------|---------------------|-----------|-------|
| Re1-C1              | 1.923(18) | 1.930 | Re2-N4              | 2.128(12) | 2.084 |
| Re1-C2              | 2.00(3)   | 1.951 | Re2-N5              | 2.153(18) | 2.175 |
| Re1-C3              | 1.99(2)   | 1.933 | Re2-N6              | 2.158(12) | 2.173 |
| Re1-N1              | 2.122(11) | 2.087 | C7-C8               | 1.443(19) | 1.417 |
| Re1-N2              | 2.178(15) | 2.174 | C8-C10              | 1.40(2)   | 1.443 |
| Re1-N3              | 2.195(13) | 2.175 | C8-C9               | 1.44(2)   | 1.416 |
| Re2-C4              | 1.962(18) | 1.934 | C10-C12             | 1.437(18) | 1.416 |
| Re2-C5              | 1.95(3)   | 1.953 | C10-C11             | 1.440(19) | 1.415 |
| Re2-C6              | 1.92(2)   | 1.931 | C11-C12             | 1.31(2)   | 1.377 |
| <i>bond angles</i>  |           |       | <i>bond angles</i>  |           |       |
| C2-Re1-C3           | 85.2(9)   | 88.9  | C6-Re2-C4           | 87.9(10)  | 89.9  |
| C2-Re1-C1           | 88.2(10)  | 89.9  | C6-Re2-C5           | 83.4(12)  | 89.0  |
| C3-Re1-C1           | 89.3(8)   | 89.9  | C4-Re2-C5           | 89.1(12)  | 90.5  |
| C2-Re1-N1           | 94.5(8)   | 92.5  | C6-Re2-N5           | 101.4(12) | 97.9  |
| C3-Re1-N1           | 90.8(6)   | 89.7  | C4-Re2-N5           | 93.7(11)  | 93.0  |
| C1-Re1-N1           | 177.3(8)  | 177.5 | C5-Re2-N5           | 174.5(8)  | 172.4 |
| C2-Re1-N2           | 174.4(8)  | 172.0 | C6-Re2-N4           | 93.2(8)   | 90.5  |
| C3-Re1-N2           | 100.2(7)  | 97.5  | C4-Re2-N4           | 176.7(11) | 178.0 |
| C1-Re1-N2           | 93.4(8)   | 92.2  | C5-Re2-N4           | 94.1(9)   | 91.9  |
| N1-Re1-N2           | 83.9(6)   | 87.8  | N5-Re2-N4           | 83.0(7)   | 85.0  |

|           |          |       |           |           |       |
|-----------|----------|-------|-----------|-----------|-------|
| C2-Re1-N3 | 99.5(8)  | 97.4  | C6-Re2-N6 | 176.6(11) | 172.4 |
| C3-Re1-N3 | 174.7(7) | 173.4 | C4-Re2-N6 | 93.4(8)   | 93.1  |
| C1-Re1-N3 | 93.5(7)  | 92.1  | C5-Re2-N6 | 99.7(8)   | 98.0  |
| N1-Re1-N3 | 86.1(5)  | 85.5  | N5-Re2-N6 | 75.4(6)   | 74.9  |
| N2-Re1-N3 | 75.1(6)  | 74.8  | N4-Re2-N6 | 85.4(5)   | 86.6  |

---

**Figure S1** Absorption spectrum of  $\{(\mu_4\text{-TCNQF4})[\text{Re}(\text{CO})_3(\text{bpy})]_4\}(\text{PF}_6)_3$  in  $\text{CH}_2\text{Cl}_2$

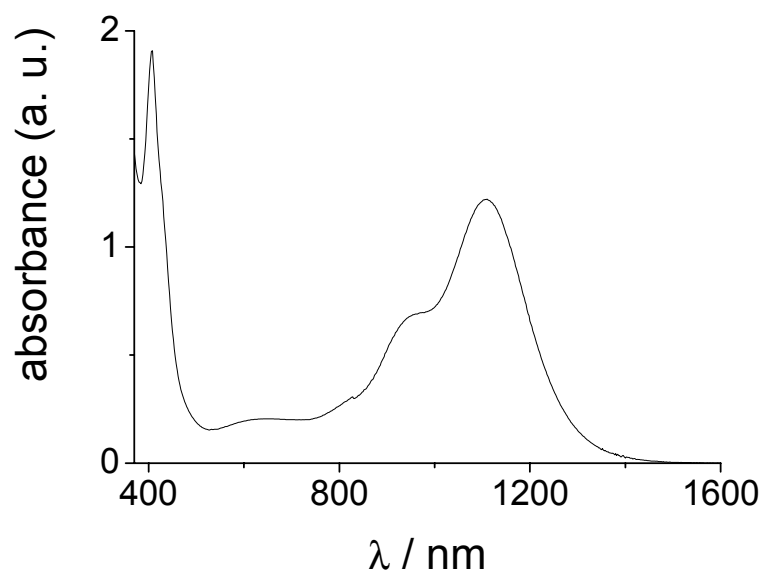

Supplement: b807977c.pdf [file b807977c.pdf]
